# Supplementary material
Source: PubMed Central journal article supplement (PMC6197821)
Supplement: NIHMS986424-supplement-1.pdf [file NIHMS986424-supplement-1.pdf]

**Supporting information for: Reduction of All-Atom Protein Folding  
Dynamics to One-Dimensional Diffusion**

Wenwei Zheng and Robert Best\*

*Laboratory of Chemical Physics, National Institute  
of Diabetes and Digestive and Kidney Diseases,  
National Institutes of Health, Bethesda, MD 20892-0520*

---

\* robertbe@helix.nih.gov

## SUPPORTING TABLES

TABLE S1. Details of simulations[2, 3] used in analysis. All simulations used the CHARMM 22\* force field, which is a variant of CHARMM 22[4] with backbone adjustments [5]. Shown are the number of residues  $N_{\text{res}}$ , the duration of each simulation  $t_{\text{sim}}$ , the boundaries of  $Q$  used to define transition paths ( $Q_u$  on the unfolded side and  $Q_f$  on the folded side of the barrier), the number of transition paths  $N_{\text{TP}}$ , the curvatures of the unfolded state ( $\omega_u$ ), barrier ( $\omega_{\ddagger}$ ) and folded state ( $\omega_f$ ), the barriers for folding ( $\Delta G_f$ ) and unfolding ( $\Delta G_u$ ), the averaged constant diffusion coefficient  $D_c$ , and the resulting Kramers prefactor  $k_0 = D_c \omega_u \omega_{\ddagger} / (2\pi k_B T)$ .

| Protein ( $N_{\text{res}}$ ) | $t_{\text{sim}}$ | $Q_u$ | $Q_f$ | $N_{\text{TP}}$ | $\omega_u$     | $\omega_{\ddagger}$ | $\omega_f$     | $\Delta G_f$ | $\Delta G_u$ | $D_c$              | $k_0$              |
|------------------------------|------------------|-------|-------|-----------------|----------------|---------------------|----------------|--------------|--------------|--------------------|--------------------|
|                              | $\mu\text{s}$    |       |       |                 | $\sqrt{k_B T}$ | $\sqrt{k_B T}$      | $\sqrt{k_B T}$ | $k_B T$      | $k_B T$      | $\mu\text{s}^{-1}$ | $\mu\text{s}^{-1}$ |
| CLN025 (10)                  | 106              | 0.03  | 0.80  | 104             | 44.6           | 7.8                 | 11.3           | 3.89         | 3.78         | 1.75               | 96.6               |
| Trp Cage (20)                | 208              | 0.10  | 0.95  | 24              | 8.9            | 9.6                 | 30.8           | 3.93         | 3.61         | 0.34               | 4.58               |
| BBA (28)                     | 325              | 0.05  | 0.77  | 24              | 13.4           | 7.4                 | 12.7           | 2.44         | 0.94         | 0.084              | 1.33               |
| NLE Villin (35)              | 125              | 0.28  | 0.94  | 86              | 7.6            | 9.9                 | 20.3           | 2.32         | 2.08         | 0.38               | 4.52               |
| GTT WW (35)                  | 1137             | 0.05  | 0.92  | 23              | 17.9           | 16.1                | 31.0           | 4.51         | 6.21         | 0.13               | 6.09               |
| mini-NTL9 (39)               | 2936             | 0.12  | 0.96  | 34              | 11.3           | 8.7                 | 36.4           | 3.20         | 5.75         | 0.10               | 1.55               |
| NuG2 (56)                    | 1155             | 0.30  | 0.92  | 27              | 7.6            | 15.7                | 31.2           | 3.03         | 4.08         | 0.036              | 0.68               |
| $\alpha_3\text{D}$ (73)      | 707              | 0.19  | 0.70  | 24              | 12.4           | 11.7                | 22.6           | 2.38         | 3.03         | 0.036              | 0.82               |
| Ubiquitin (76)               | 7839             | 0.10  | 0.95  | 28              | 16.1           | 11.8                | 36.5           | 6.12         | 6.45         | 0.12               | 3.74               |
| $\lambda$ -repressor (80)    | 643              | 0.40  | 0.90  | 10              | 10.2           | 9.9                 | 20.6           | 2.02         | 1.12         | 0.028              | 0.45               |

TABLE S2. Correlations of landscape parameters and Kramers prefactors  $k_0$  with protein length. For 10 data points, the critical value of  $t$  at the two-sided 5 % significance level is  $|t| = 2.23$ .

| Parameter           | Spearman Correlation | Student $t$ |
|---------------------|----------------------|-------------|
| $Q_u$               | 0.81                 | 3.97        |
| $Q_{\ddagger}$      | 0.08                 | 0.22        |
| $Q_f$               | 0.01                 | 0.03        |
| $\omega_u$          | -0.20                | -0.58       |
| $\omega_{\ddagger}$ | 0.50                 | 1.65        |
| $\omega_f$          | 0.50                 | 1.65        |
| $\Delta G_f$        | -0.04                | -0.82       |
| $\Delta G_u$        | 0.01                 | 0.33        |
| $D_c$               | -0.75                | -3.19       |
| $k_0$               | -0.84                | -4.04       |

## SUPPORTING FIGURES

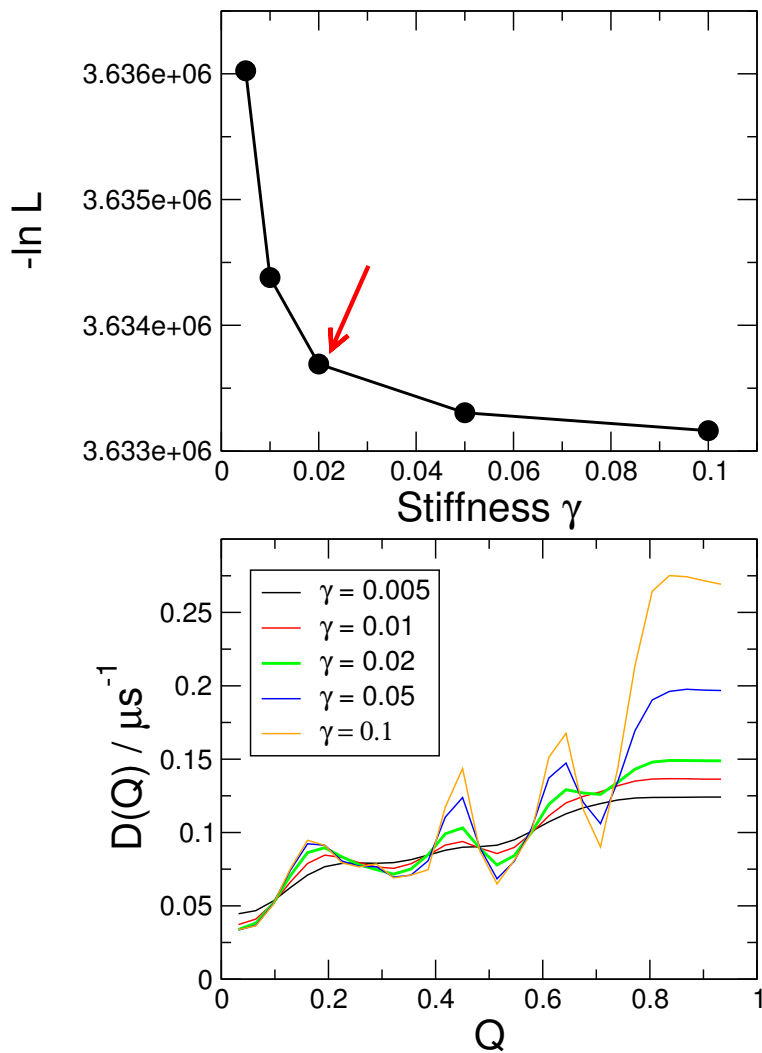

FIG. S1. Choice of stiffness parameter  $\gamma$ . Top: variation of the negative log-likelihood of the diffusion model as a function of  $\gamma$ . Red arrow indicates the chosen  $\gamma = 0.02$ . Bottom: Position-dependent diffusion coefficient profiles  $D(Q)$  obtained using  $\gamma$  values in top plot.

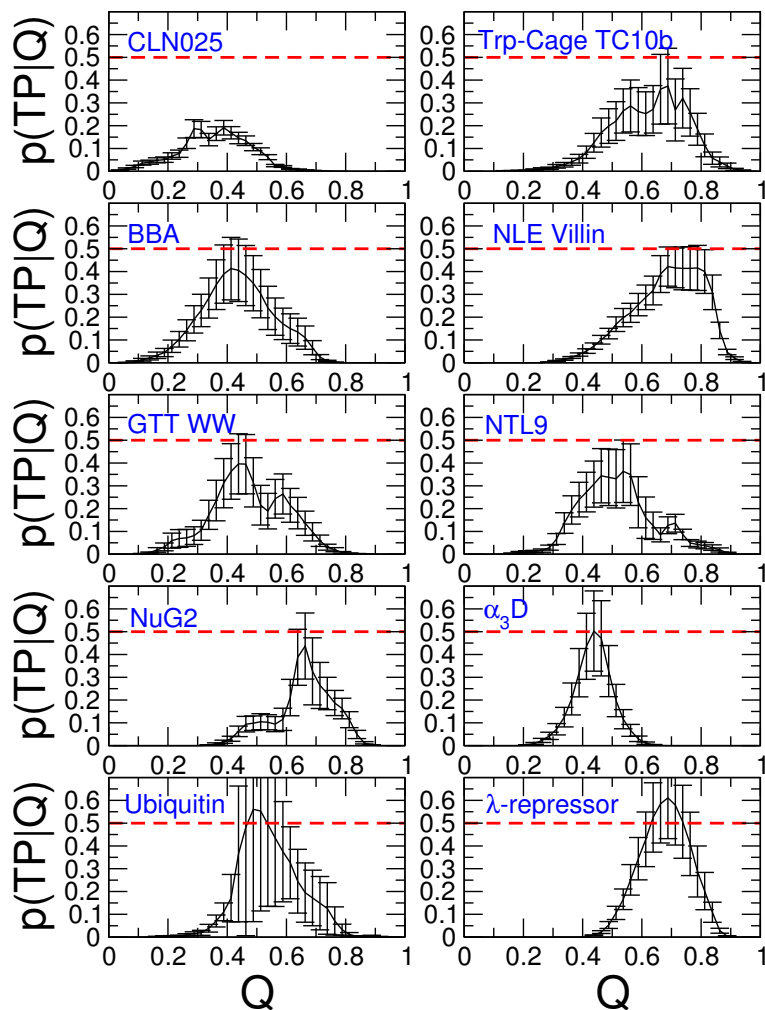

FIG. S2. Bayesian criterion for reaction coordinate quality. For each of the ten proteins considered, we plot the quantity  $p(TP|Q)$  – the probability of being on a transition path given a particular value of  $Q$ . Errors are determined by block error analysis, and the broken red line shows the theoretical maximum  $p(TP|Q) = 0.5$ . In some cases,  $p(TP|Q)$  exceeds this value, due to limited statistics.

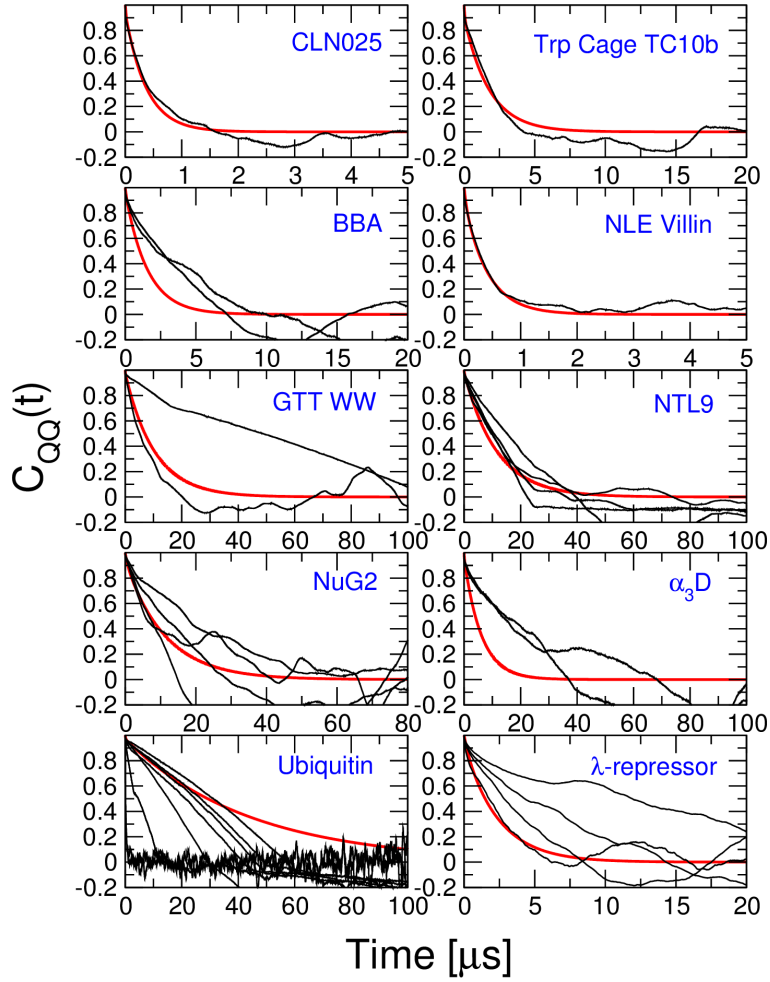

FIG. S3. Autocorrelation functions for  $Q$  computed from the diffusion model (red) and from the original trajectories (black). Individual correlation functions are shown for each separate trajectory (where applicable), to give an idea of the uncertainty. For ubiquitin, two of the trajectories contained no folding or unfolding events, and hence  $C_{QQ}(t)$  decays very rapidly.

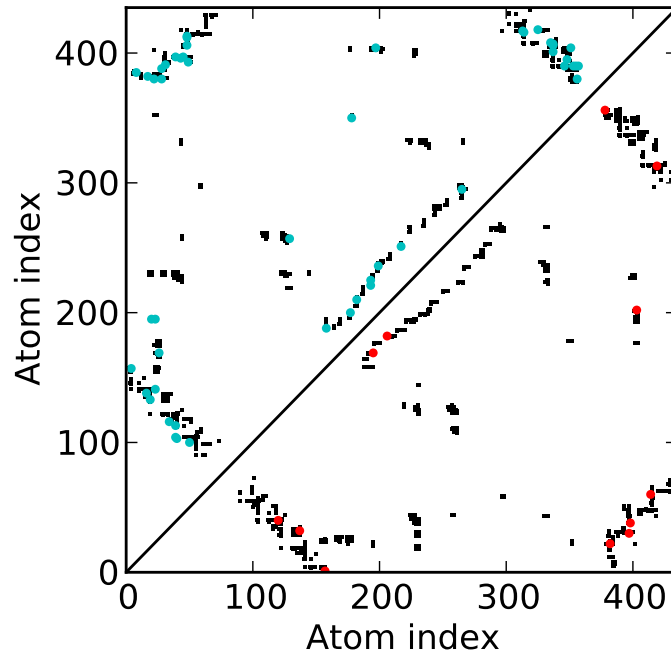

FIG. S4. The most positive ( $w_i > 0.01$  shown in cyan dots) and negative weights ( $w_i < -0.01$  shown in red dots) in calculating  $Q_{\text{opt}}$  in NuG2.

## REFERENCES

---

- [1] Best, R. B.; Hummer, G. *Proc. Natl. Acad. Sci. U.S.A.* **2005**, *102*, 6732–6737.
- [2] Lindorff-Larsen, K.; Piana, S.; Dror, R. O.; Shaw, D. E. *Science* **2011**, *334*, 517–520.
- [3] Piana, S.; Lindorff-Larsen, K.; Shaw, D. E. *Proc. Natl. Acad. Sci. U.S.A.* **2013**, *110*, 5915–5920.
- [4] Mackerell, A. D., Jr. et al. *J. Phys. Chem. B* **2000**, *102*, 3586–3616.
- [5] Piana, S.; Lindorff-Larsen, K.; Shaw, D. E. *Biophys. J.* **2011**, *100*, L47–L49.
